# Supplementary material for: Stereospecific microwave-assisted conversion of a Ru(ii)-p-cymene complex to a solar cell dye in water
Source: Royal Society of Chemistry journal article supplement (doi:10.1039/c1nj20692c), 2011-01-01
Supplement: c1nj20692c.pdf [file c1nj20692c.pdf]

## Electronic Supplementary Information

### Stereospecific microwave assisted conversion of a Ru(II)-p-cymene Complex to a solar cell dye in water

Stine H. Kristensen<sup>a</sup>, Jeremiah Toster<sup>b</sup>, Swaminathan Iyer<sup>\*b</sup> and Colin Raston<sup>\*b</sup>

<sup>ab</sup> Centre for Strategic Nano-Fabrication, The University of Western Australia, 35 Stirling Highway, Crawley, WA 6009, Australia.

Fax: (618) 64881005; Tel: (618) 64883045; E-mail: colin.raston@uwa.edu.au

|                                                                                                        |    |
|--------------------------------------------------------------------------------------------------------|----|
| 1. Detailed Method                                                                                     | S2 |
| 2. Allocated <sup>1</sup> H NMR spectra of <i>cis</i> -RuL <sub>2</sub> NCS <sub>2</sub> .             | S3 |
| 3. Mass Spec of <i>cis</i> -RuL <sub>2</sub> NCS <sub>2</sub> .                                        | S4 |
| 4. <sup>1</sup> H NMR spectra of <i>cis</i> -RuL <sub>2</sub> Cl <sub>2</sub> (intermediate compound). | S5 |
| 5. UV/Vis spectra of <i>cis</i> -RuL <sub>2</sub> Cl <sub>2</sub> .                                    | S6 |

#### Detailed Method:

CEM Discover Benchmate microwave unit was used for all microwave reactions. KNCS, The Ru(II)-*p*-cymene metal precursor, Scheme 1, and 4,4'-dicarboxylic acid-2,2'-bipyridine (dcbp) were all used as supplied by Dyesol. Hydrochloric acid (HCl) 32% supplied by Ajax Finechem was used as received. Analysis was carried out using the Perkin Elmer Spectrum One FTIR, the Varian Cary 50 UV-Vis and the Varian 400 HNMR spectrometer.

Ru-*p*-cymene (0.081mmol) and dcbpy (0.287mmol) were mixed in a solution of 1.5 mL H<sub>2</sub>O and 1.5 mL HCl (32%) in a pressurised microwave vial. The solution was heated to 170°C using microwave heating for 60 minutes with a power of 300 W and a pressure of 10 bar. After cooling the solution, a black powder was isolated by suction filtration and washed with water.

The next step in the synthesis of *cis*-RuL<sub>2</sub>(NCS)<sub>2</sub> was to substitute the chloride ions with thiocyanate ions. The *cis*-RuL<sub>2</sub>Cl<sub>2</sub> complex(0.19mmol) and KNCS (1.31mmol) were mixed in 3 mL H<sub>2</sub>O, and the solution was heated to 170°C and irradiated with microwaves for 30 minutes with a power of 300 W and 10 bar. After cooling a black powder was vacuum filtered and washed with water.

| Proton | $\delta(\text{H})/\text{ppm}$ |
|--------|-------------------------------|
| 1      | 9.36                          |
| 2      | 8.03                          |
| 3      | 8.76                          |
| 4      | 7.62                          |
| 5      | 7.33                          |
| 6      | 8.57                          |

Figure 1: Cis-RuL<sub>2</sub>(NCS)<sub>2</sub> Ruthenium Dye

Figure 2: table of <sup>1</sup>H NMR chemical shifts with proton allocation.

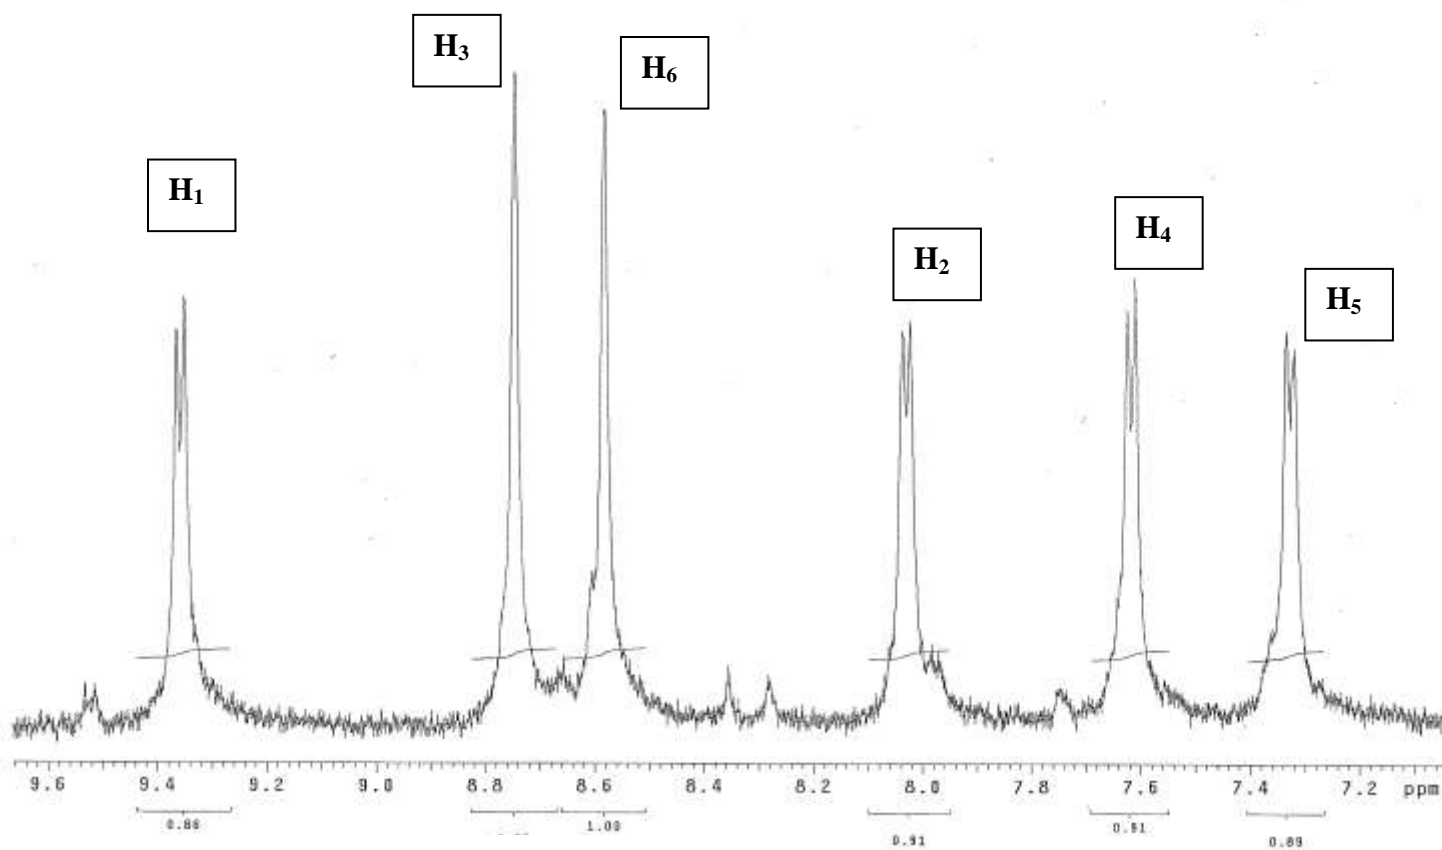

Figure 3: <sup>1</sup>H NMR of cis-RuL<sub>2</sub>(NCS)<sub>2</sub>

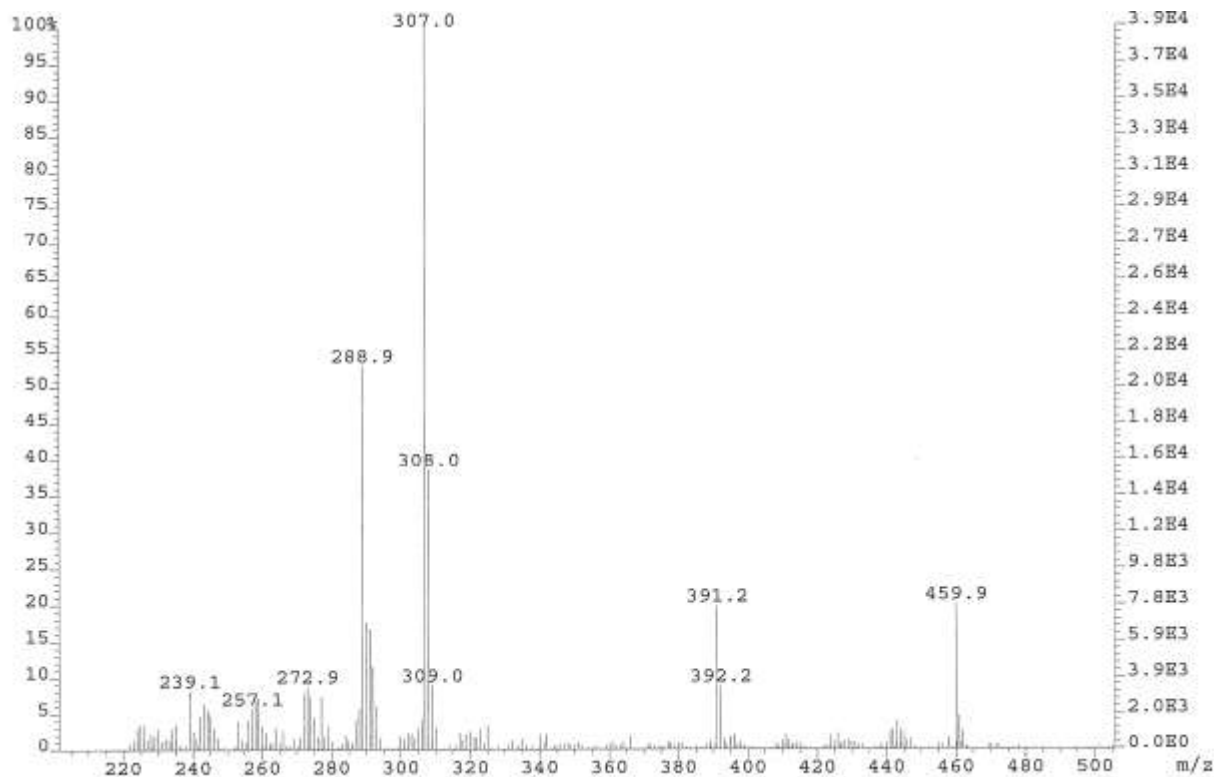

Figure 4: Mass Spec of cis-RuL<sub>2</sub>(NCS)<sub>2</sub>

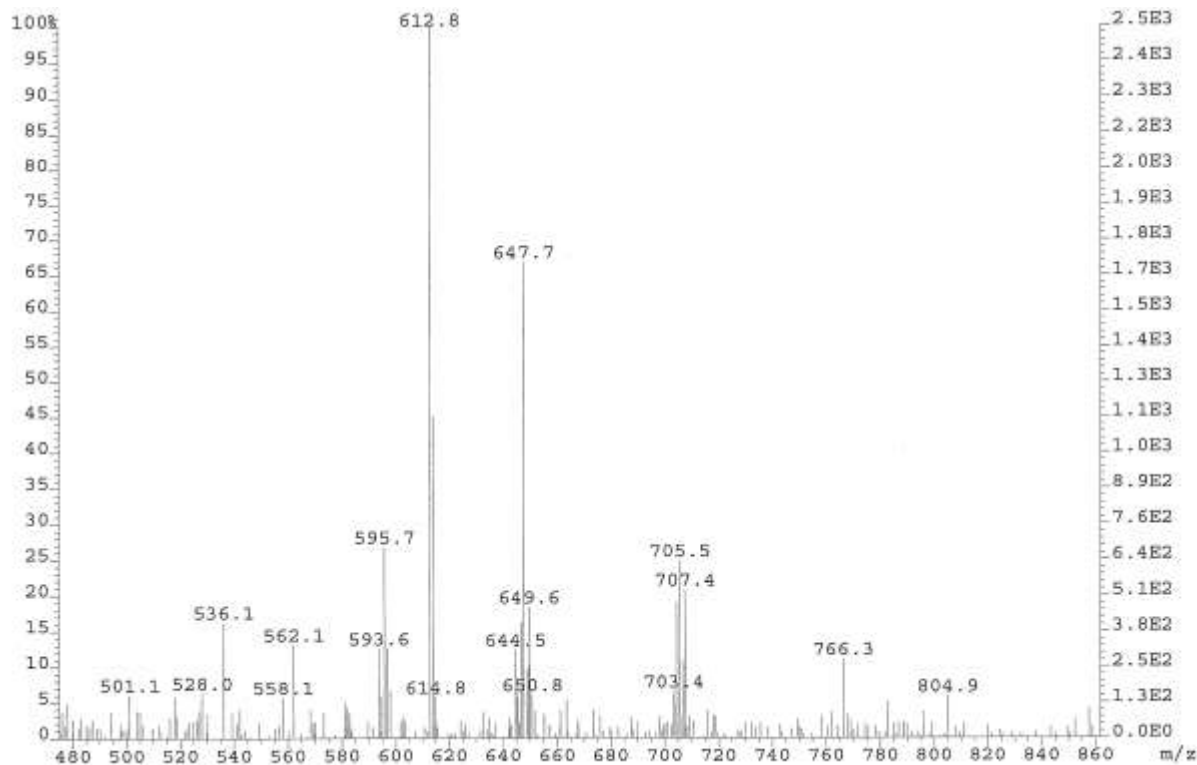

Figure 5: Mass Spec of cis-RuL<sub>2</sub>(NCS)<sub>2</sub>

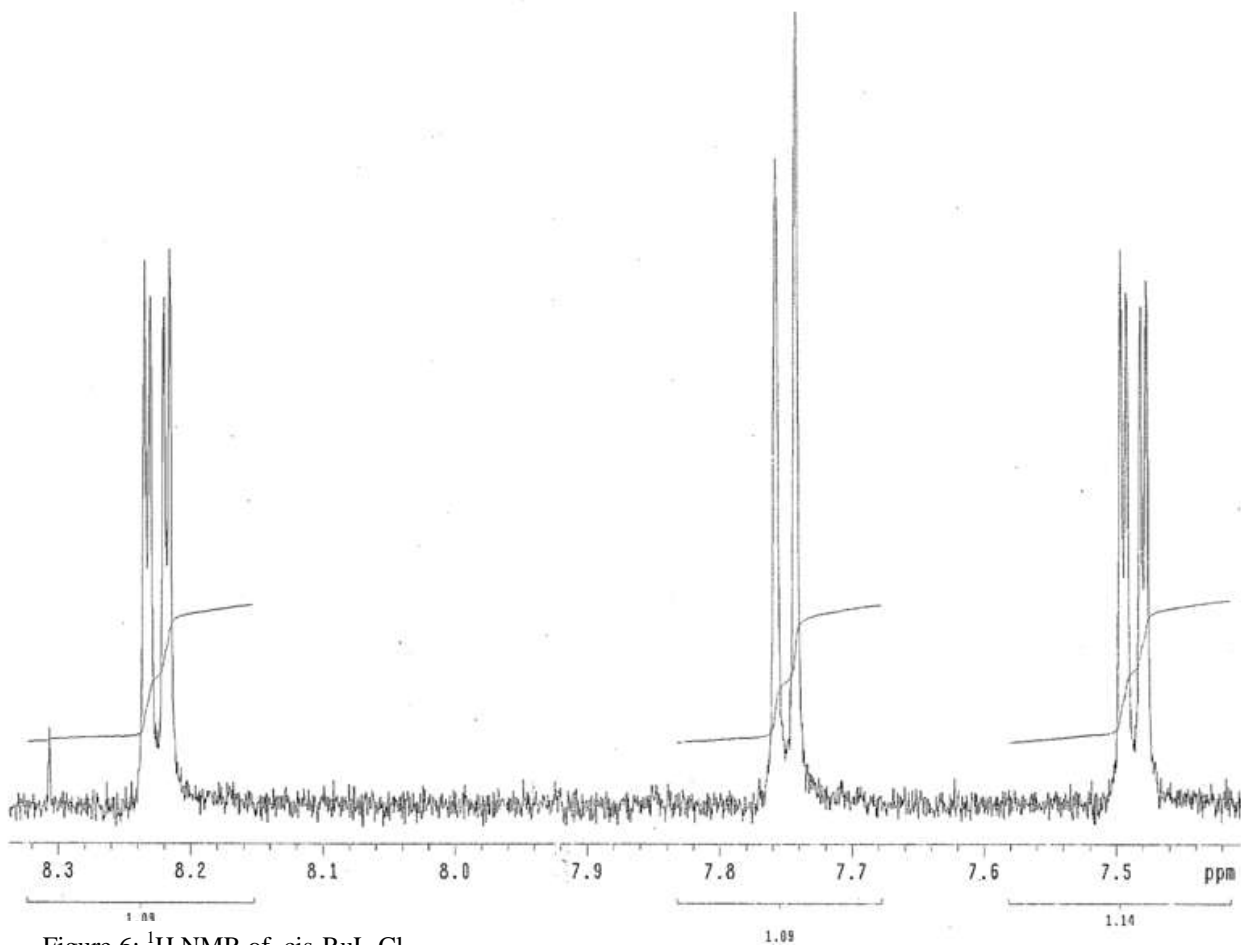

Figure 6:  $^1\text{H}$  NMR of  $\text{cis-RuL}_2\text{Cl}_2$

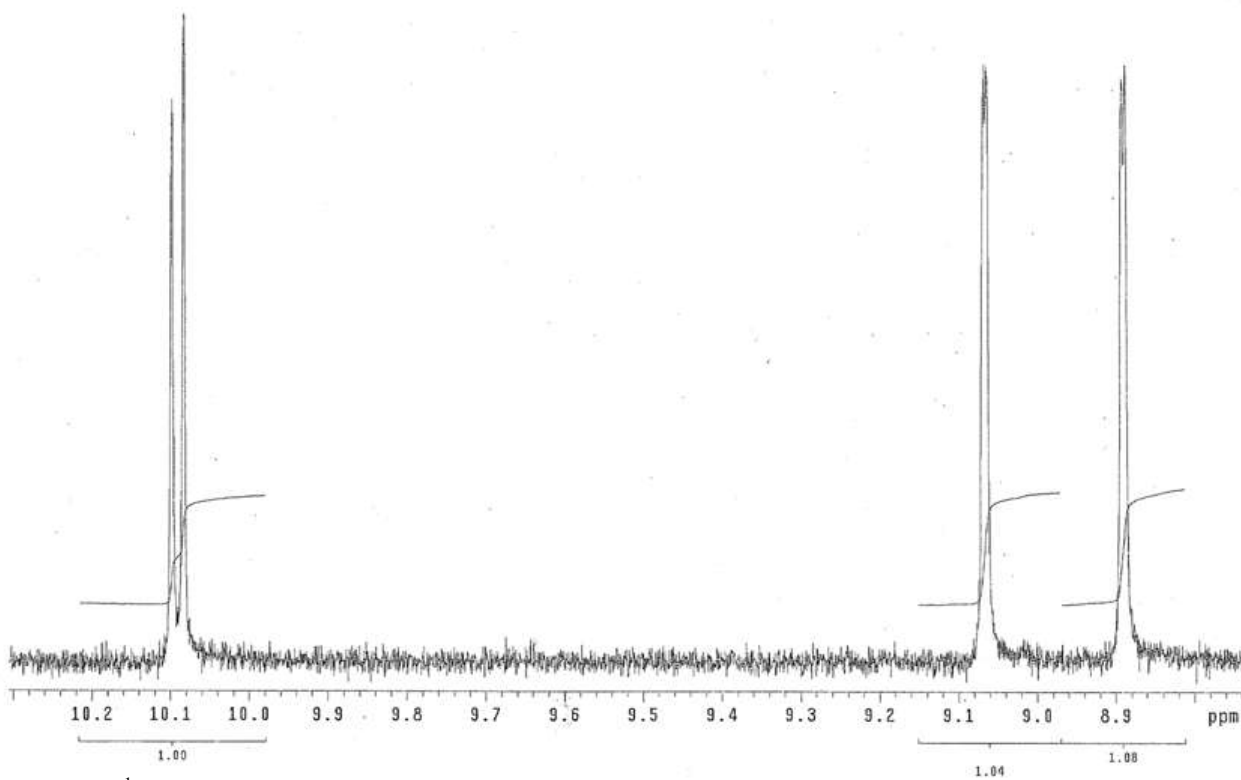

Figure 7:  $^1\text{H}$  NMR of  $\text{cis-RuL}_2\text{Cl}_2$

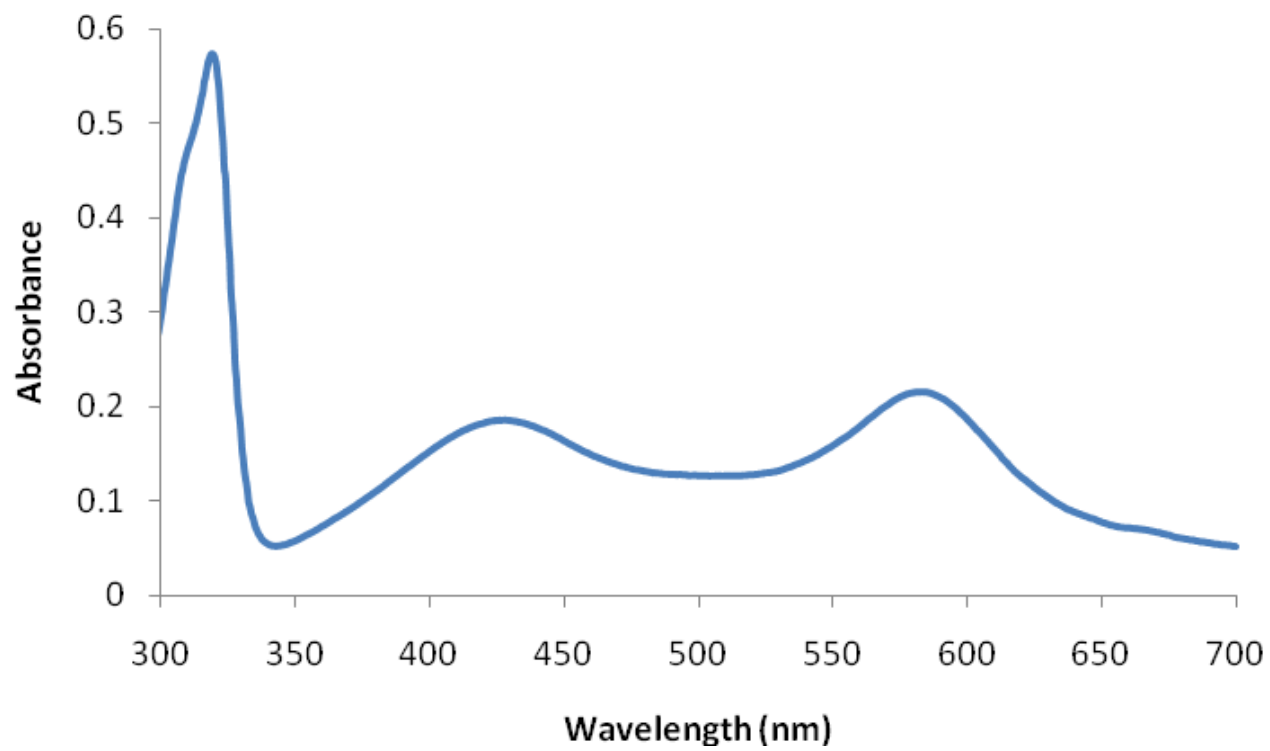

Figure 8: UV/Vis Spectra of *cis*-RuL<sub>2</sub>Cl<sub>2</sub>.
